# Supplementary material
Source: PubMed Central journal article supplement (PMC2258868)
Supplement: jbacter_190_6_2096__1.pdf [file jbacter_190_6_2096__1.pdf]

**Supplementary Table 1. *Ehrlichia chaffeensis* virB/D loci**

| Chromosomal coordinates | operon or gene                                                                                                           | Coordinates of promoter regions used for: |                    |
|-------------------------|--------------------------------------------------------------------------------------------------------------------------|-------------------------------------------|--------------------|
|                         |                                                                                                                          | EMSA                                      | Reporter construct |
| 42178-36100             | <i>virB8-1</i> → <i>virB9-1</i> →<br><i>virB10</i> → <i>virB11</i> →<br><i>virD4</i>                                     | 42418-42161                               | 42628-42179        |
| 480037-501957           | <i>sodB</i> → <i>virB3</i> →<br><i>virB4-1</i> → <i>virB6-1</i> →<br><i>virB6-2</i> → <i>virB6-3</i> →<br><i>virB6-4</i> | 479718-480068                             | 479684-480036      |
| 1073487-1071112         | <i>virB4-2</i>                                                                                                           | 1073853-1073489                           | 1073853-1073489    |
| 588503-589192           | <i>virB8-2</i>                                                                                                           | 588103-588505                             | 588049-588502      |
| 207062-206250           | <i>virB9-2</i>                                                                                                           | 207405-207079                             | 207405-207063      |

**Supplementary Table 2. Prediction of the transcriptional start sites and Sigma<sup>70</sup> promoter elements of *virB4-2*, *virB8-2* and *virB9-2*.**

| Gene name      | -35 box   |          | -10 box   |           | Transcriptional start site |
|----------------|-----------|----------|-----------|-----------|----------------------------|
|                | Position  | Sequence | Position  | Sequence  |                            |
| <i>virB4-2</i> | -271→-266 | TTAAAT   | -246→-238 | TTGTATAAT | -231                       |
| <i>virB8-2</i> | -283→-278 | TTAACA   | -264→-256 | AGCTAACTT | -248                       |

---

*virB9-2*      -352→-347      TTCACA      -328→-320      TGCTAAAAT      -313

---
